# Supplementary material for: A convenient fluorescent assay for quinolones based on their inhibition towards the oxidase-like activity of Cu2+
Source: Royal Society of Chemistry journal article supplement (doi:10.1039/c8nj06285d), 2019-01-01
Supplement: c8nj06285d1.pdf [file c8nj06285d1.pdf]

## Electronic Supporting Information

### A convenient fluorescent assay for quinolones based on their inhibition towards the oxidase-like activity of Cu<sup>2+</sup>

Shuyun Zhu <sup>a\*</sup>, Han Cao <sup>a</sup>, Xiaolu Yan <sup>a</sup>, Jing Sun <sup>b</sup>, Jiayi Qiu <sup>a</sup>, Xiaoqing Qu <sup>a</sup>, Ya-Nan Zuo <sup>a</sup>,

Xiao Wang <sup>c</sup>, Xian-En Zhao <sup>a\*</sup>

<sup>a</sup> College of Chemistry and Chemical Engineering, Qufu Normal University, Qufu City, Shandong Province, 273165, China. E-mail: shuyunzhu1981@163.com (S. Zhu); xianenzhao@163.com (X. Zhao).

<sup>b</sup> Qinghai Key Laboratory of Qinghai-Tibet Plateau Biological Resources, Northwest Institute of Plateau Biology, Chinese Academy of Sciences, Xining City, Qinghai Province, 810001, Qinghai, China.

<sup>c</sup> Shandong Key Laboratory of TCM Quality Control Technology, Shandong Analysis and Test Center, Qilu University of Technology (Shandong Academy of Sciences), 19 Keyuan Street, Jinan 250014, China.

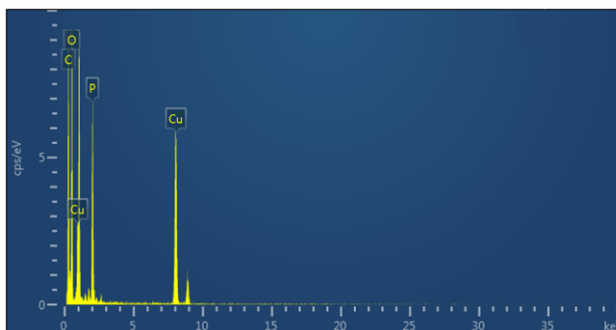

Fig. S1 The EDS pattern of copper nanoparticles formed during the reaction process of Cu<sup>2+</sup> and OPD.

**Table S1** The linear equations, linear ranges, and LODs for the analysis of quinolones using DNA-AgNCs-Cu<sup>2+</sup> system.

| Quinolones     | Linear equation       | Linear range | LOD     |
|----------------|-----------------------|--------------|---------|
| nalidixic acid | $y = -1.327 + 6.396x$ | 1.0-10 nM    | 0.34 nM |
|                | $y = 50.08 + 1.169x$  | 10-100 nM    |         |
| cinoxacin      | $y = 1.486 + 7.012x$  | 0.5-10 nM    | 0.15 nM |
|                | $y = 62.31 + 0.8864x$ | 10-100 nM    |         |
| ciprofloxacin  | $y = -4.699 + 7.791x$ | 1.0-10 nM    | 0.30 nM |
|                | $y = 61.84 + 1.084x$  | 10-100 nM    |         |
| moxifloxacin   | $y = 5.828 + 6.116x$  | 0.1-10 nM    | 35 pM   |
|                | $y = 51.53 + 1.159x$  | 10-100 nM    |         |
